# Supplementary material for: Synthesis and catalytic activity of heterogeneous rare-earth metal catalysts coordinated with multitopic Schiff-base ligands
Source: Royal Society of Chemistry journal article supplement (doi:10.1039/c2dt30763d), 2012-01-01

## Supporting Information

Synthesis and catalytic activity of heterogeneous rare-earth metal  
catalysts coordinated with multitopic Schiff-base ligands

Yilin Sun, Guangming Wu, Dinghai Cen,

Yaofeng Chen and Limin Wang

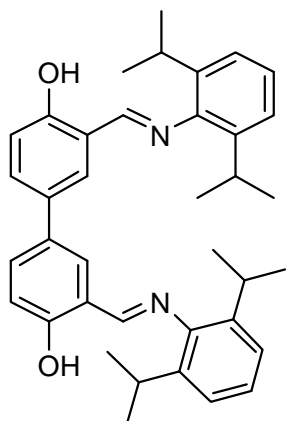

**H2L1**

$^1\text{H NMR}(\text{CDCl}_3, 25^\circ \text{C})$

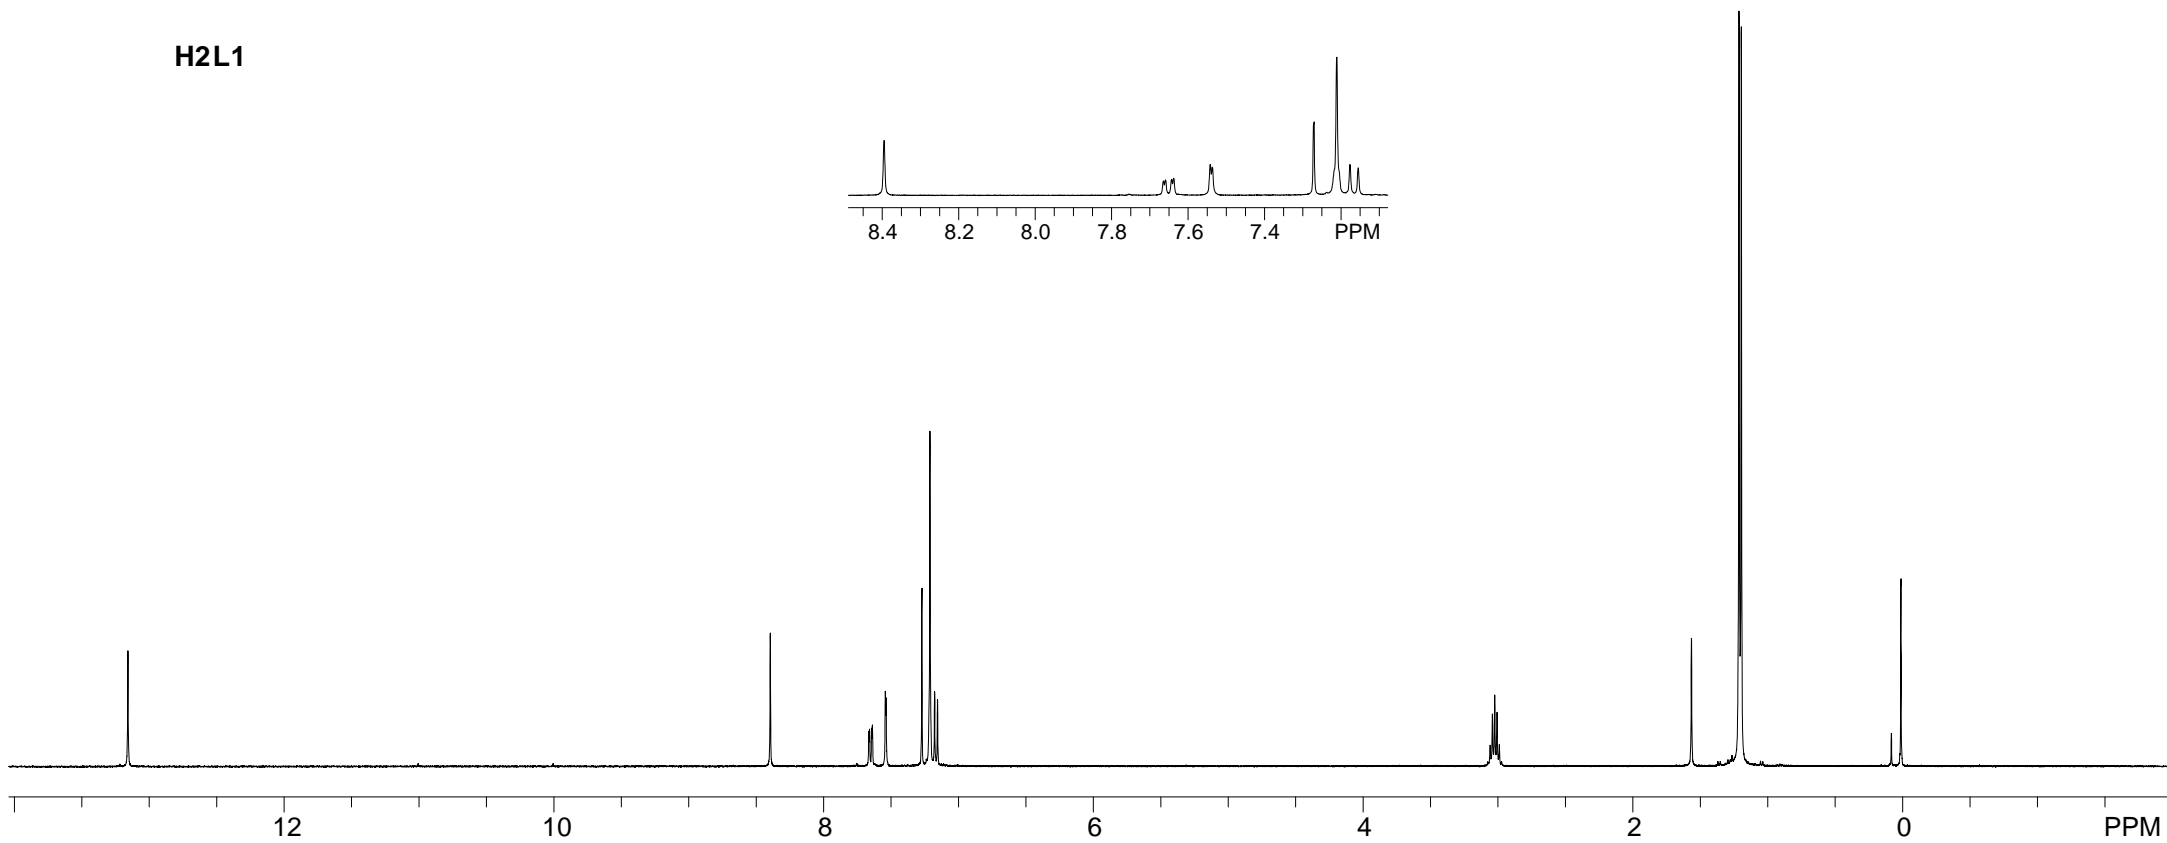

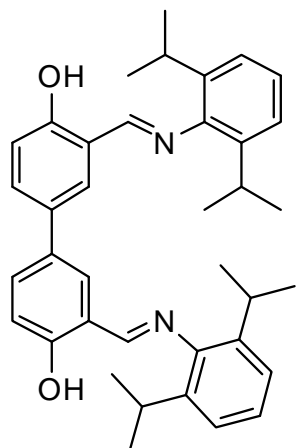

**H2L1**

$^{13}\text{C}$  NMR ( $\text{CDCl}_3$ , 25° C)

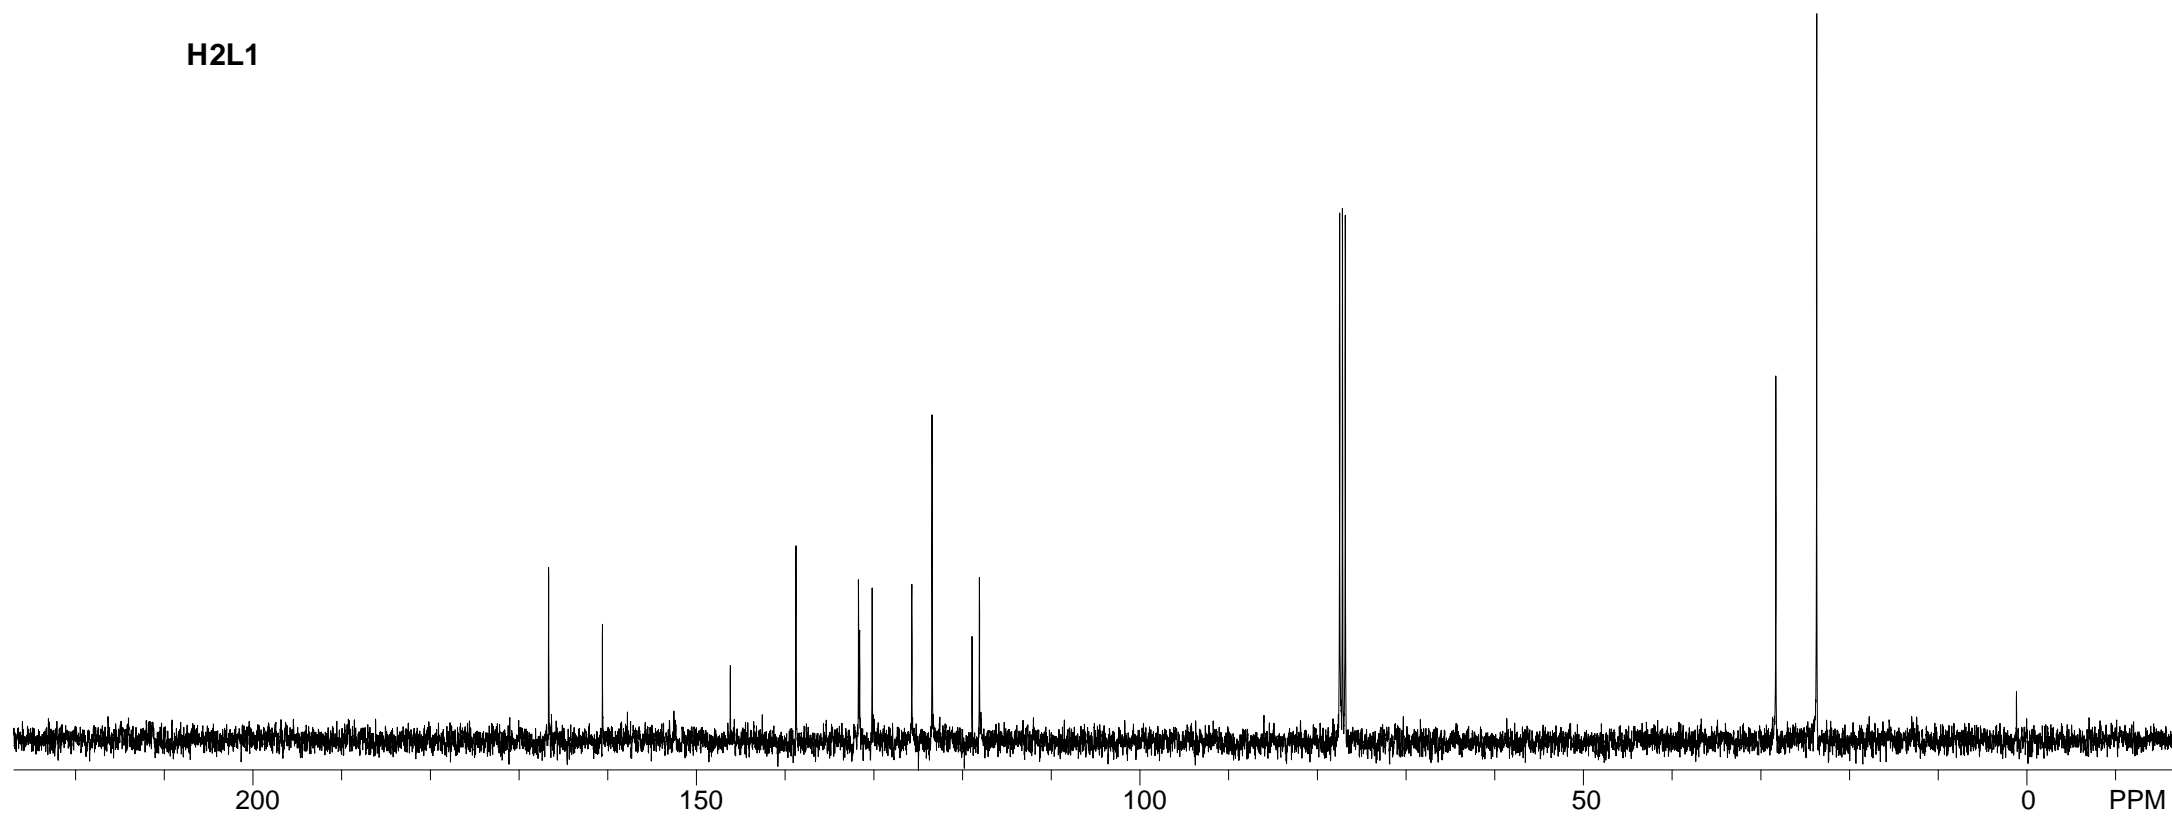

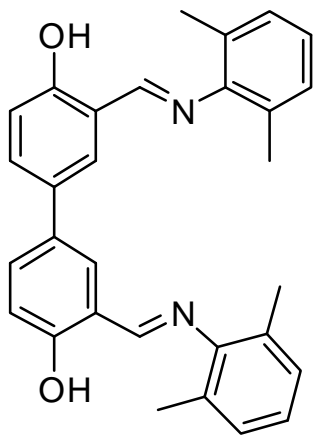

**H2L2**

$^1\text{H NMR}(\text{C}_6\text{D}_6, 25^\circ \text{C})$

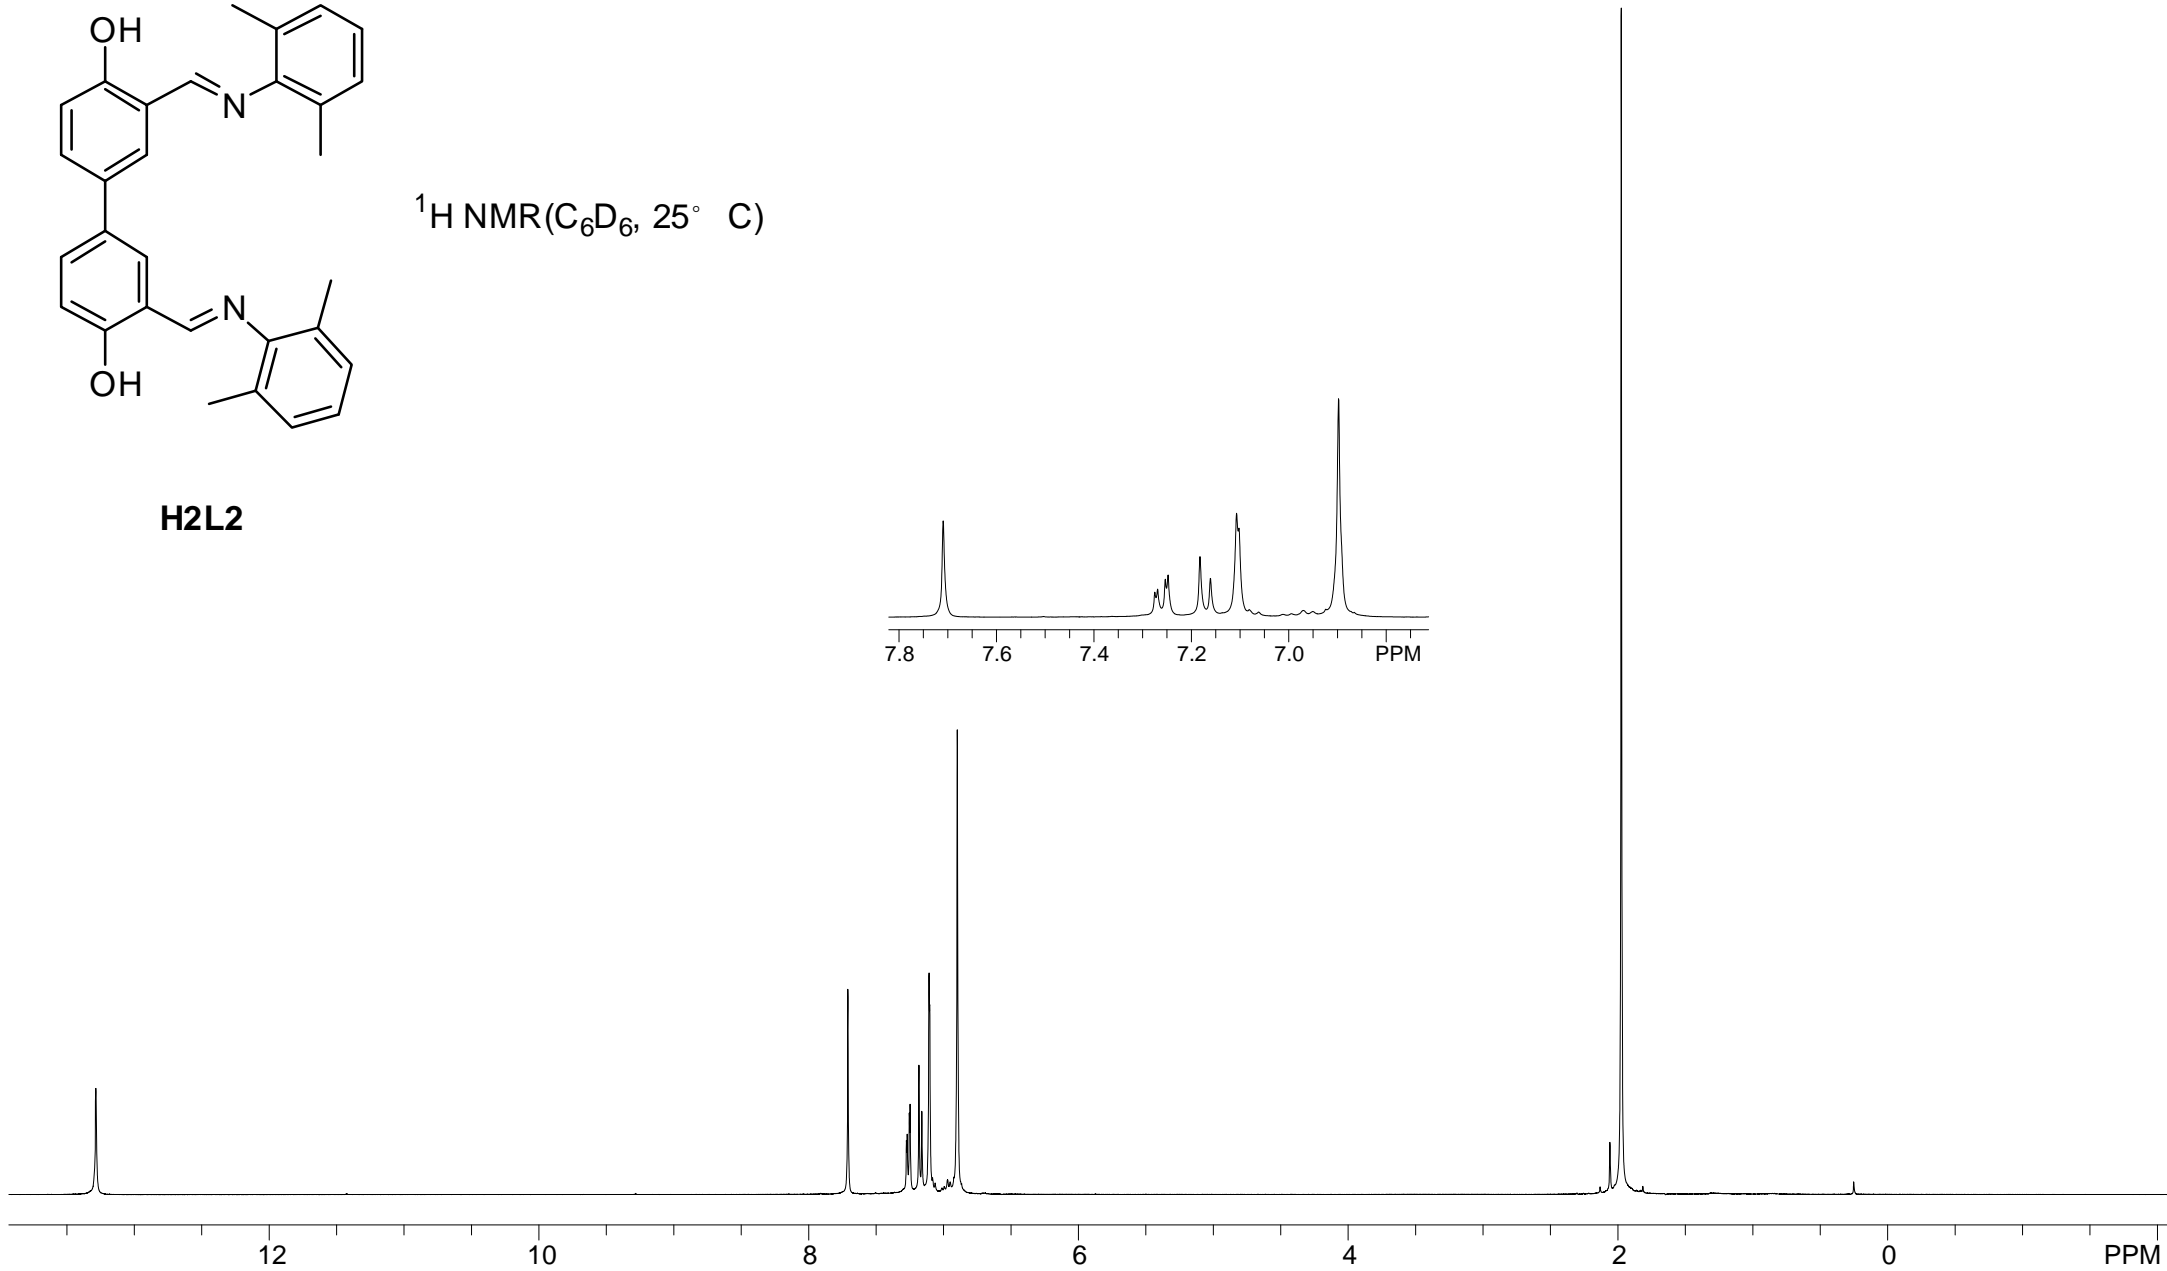

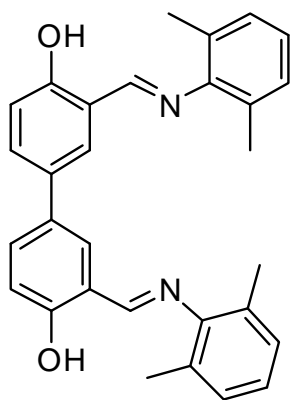

**H2L2**

$^{13}\text{C}$  NMR ( $\text{C}_6\text{D}_6$ , 25° C)

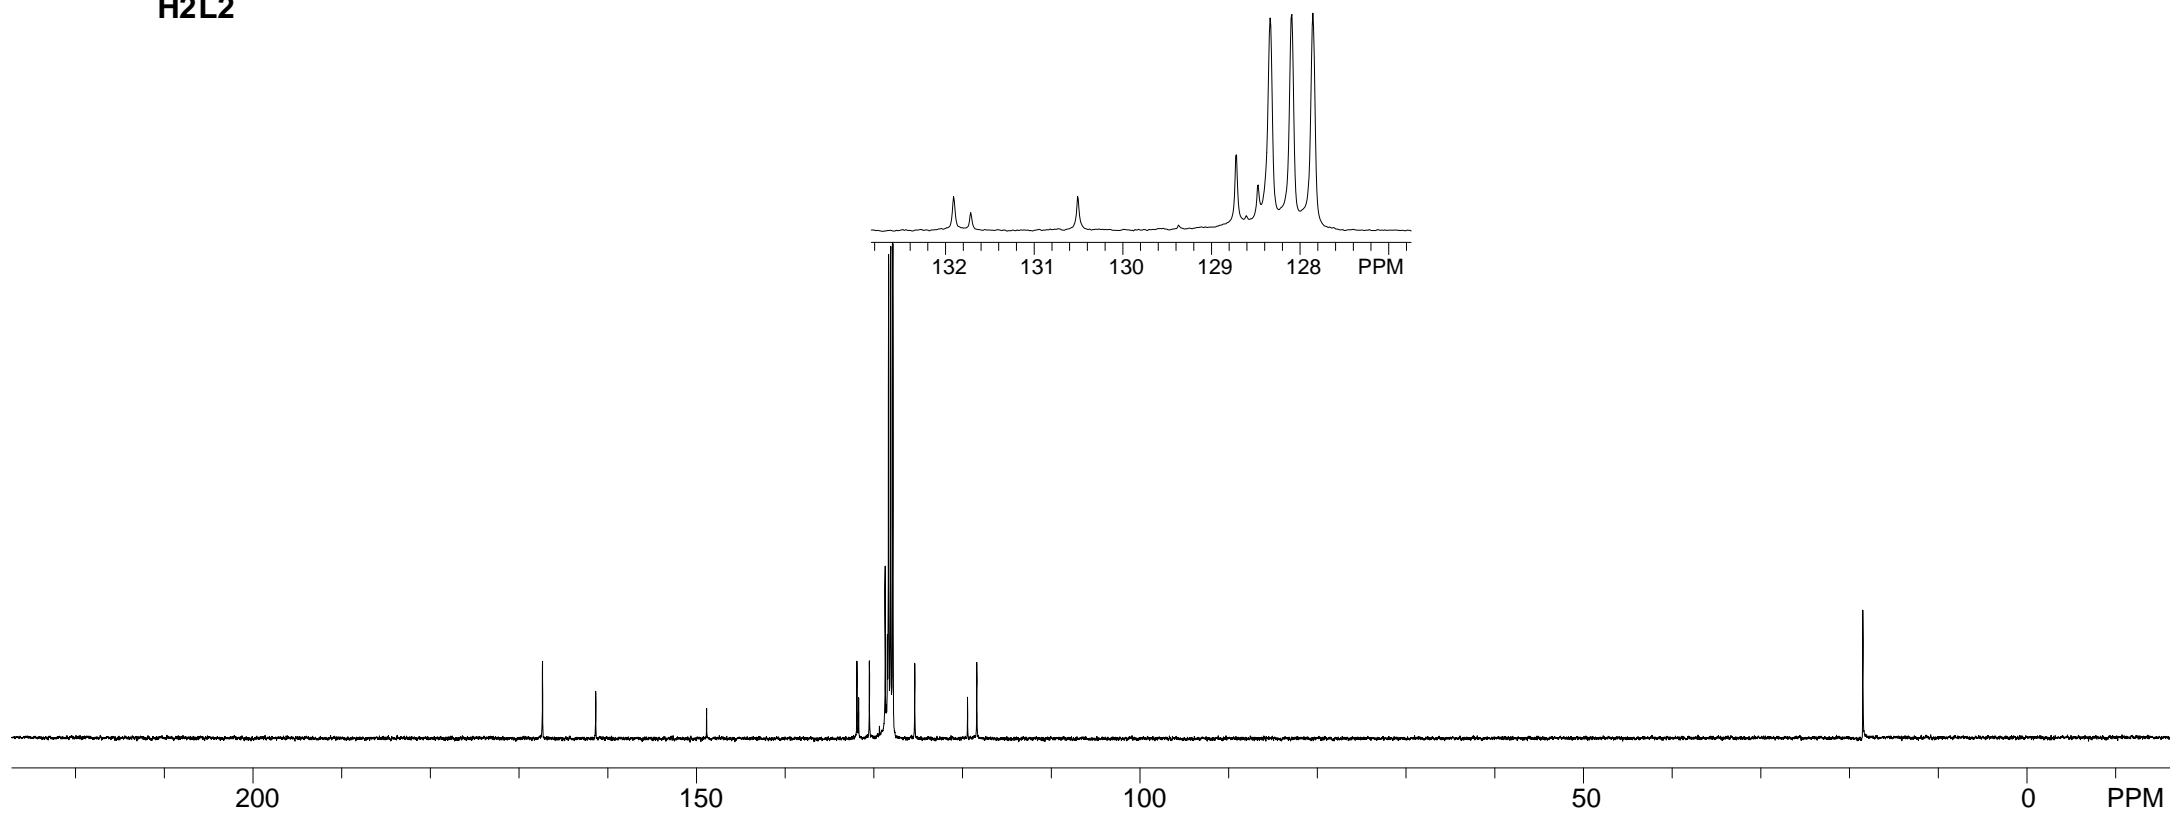

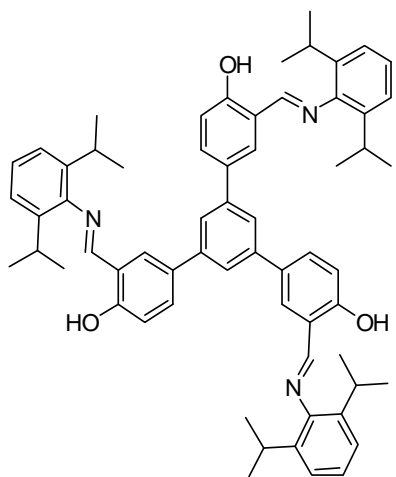

**H3L4**

$^1\text{H NMR}(\text{CDCl}_3, 25^\circ \text{C})$

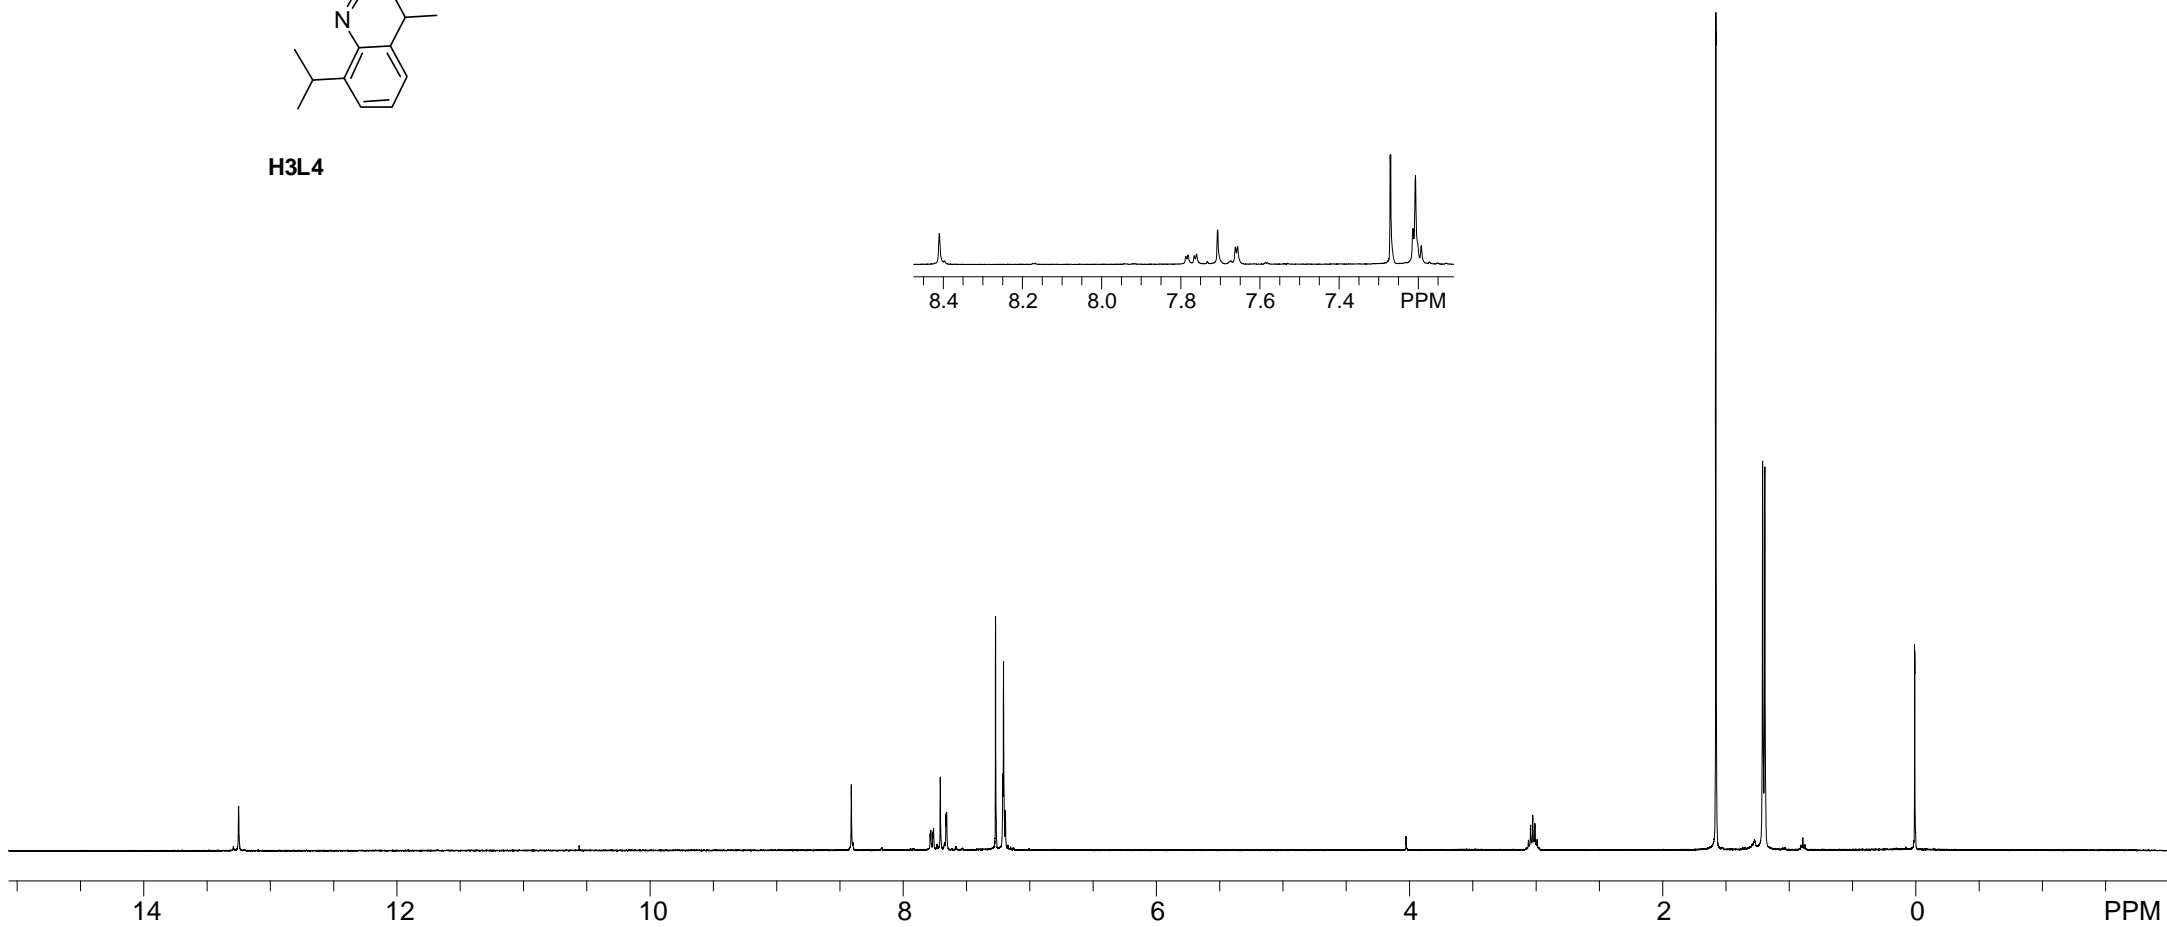

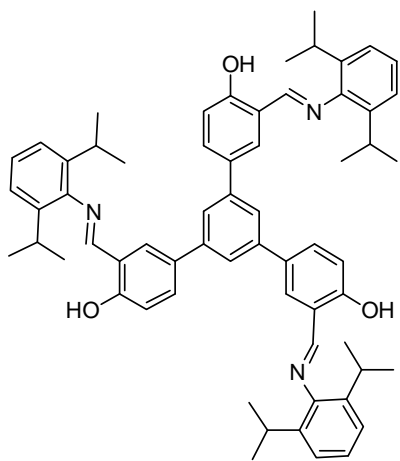

**H3L4**

$^{13}\text{C}$  NMR( $\text{CDCl}_3$ , 25° C)

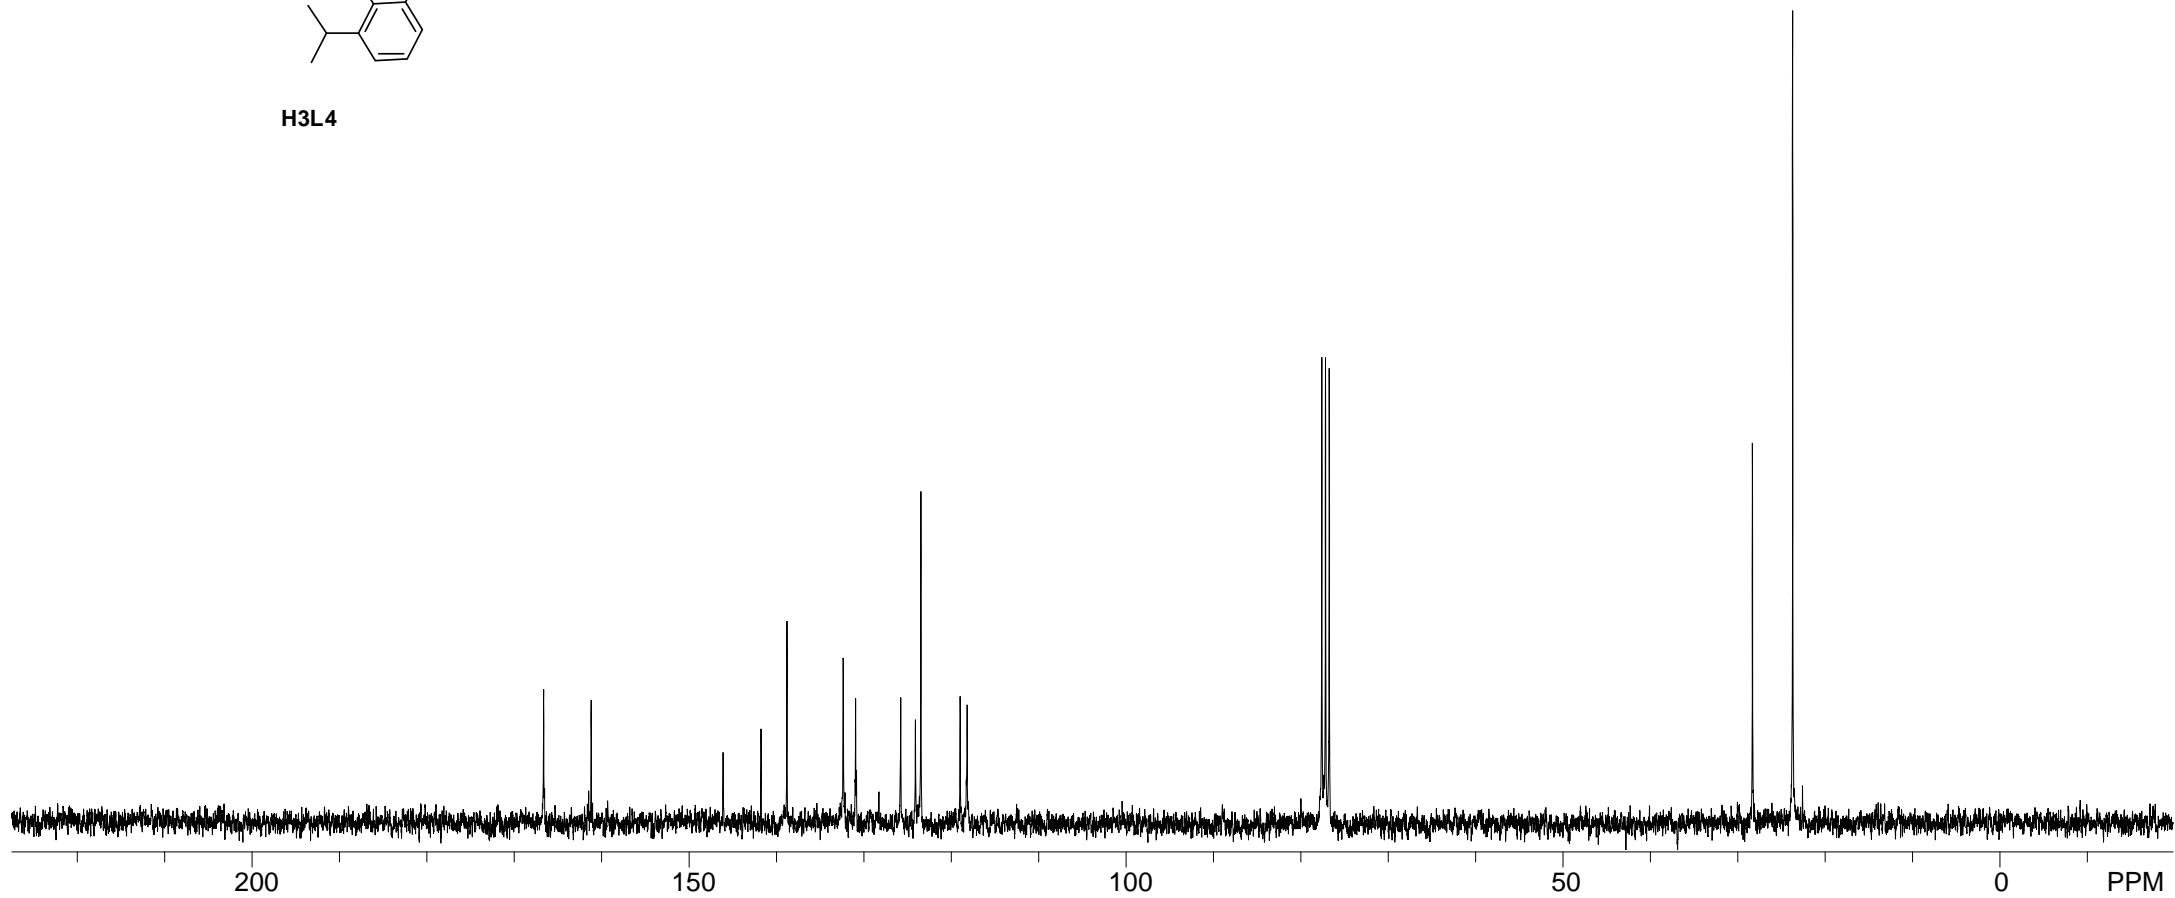

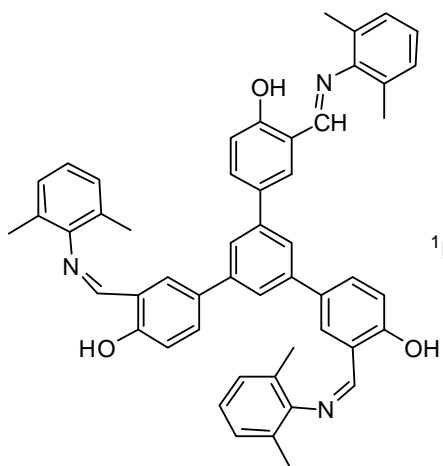

<sup>1</sup>H NMR(CDCl<sub>3</sub>, 25° C)

**H3L3**

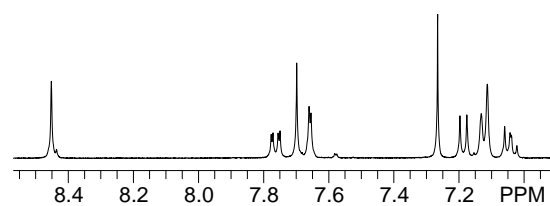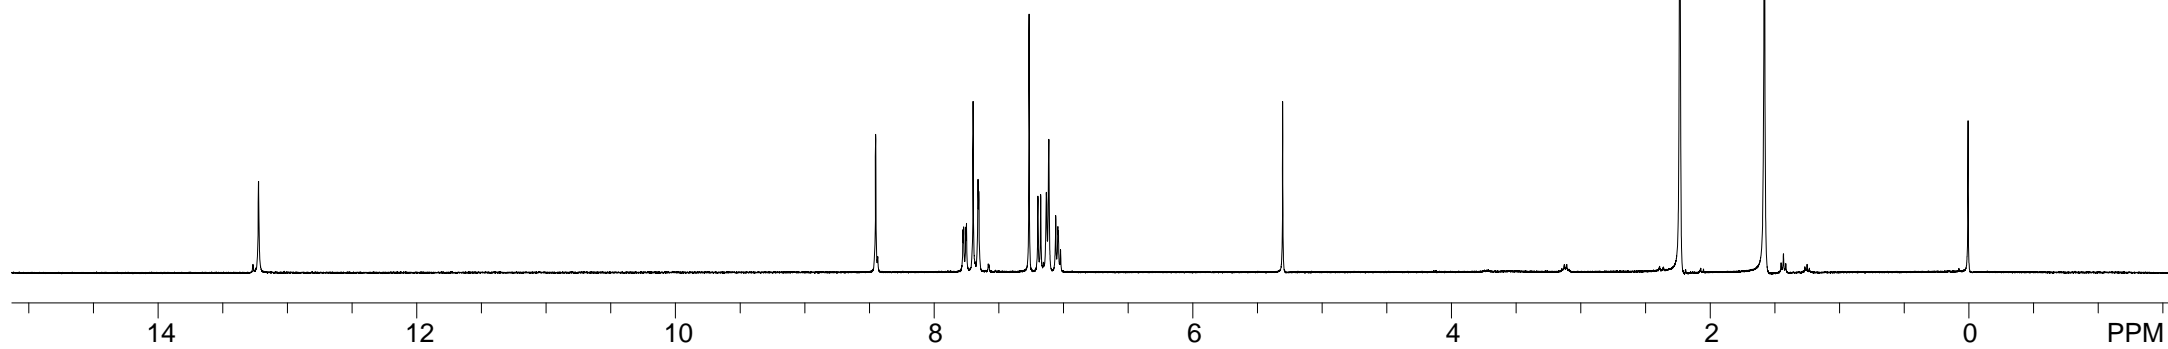



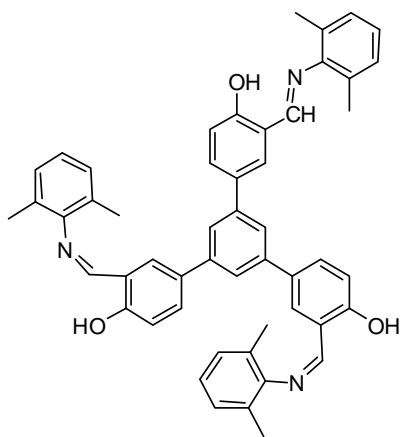

**H3L3**

$^{13}\text{C}$  NMR( $\text{CDCl}_3$ , 25° C)

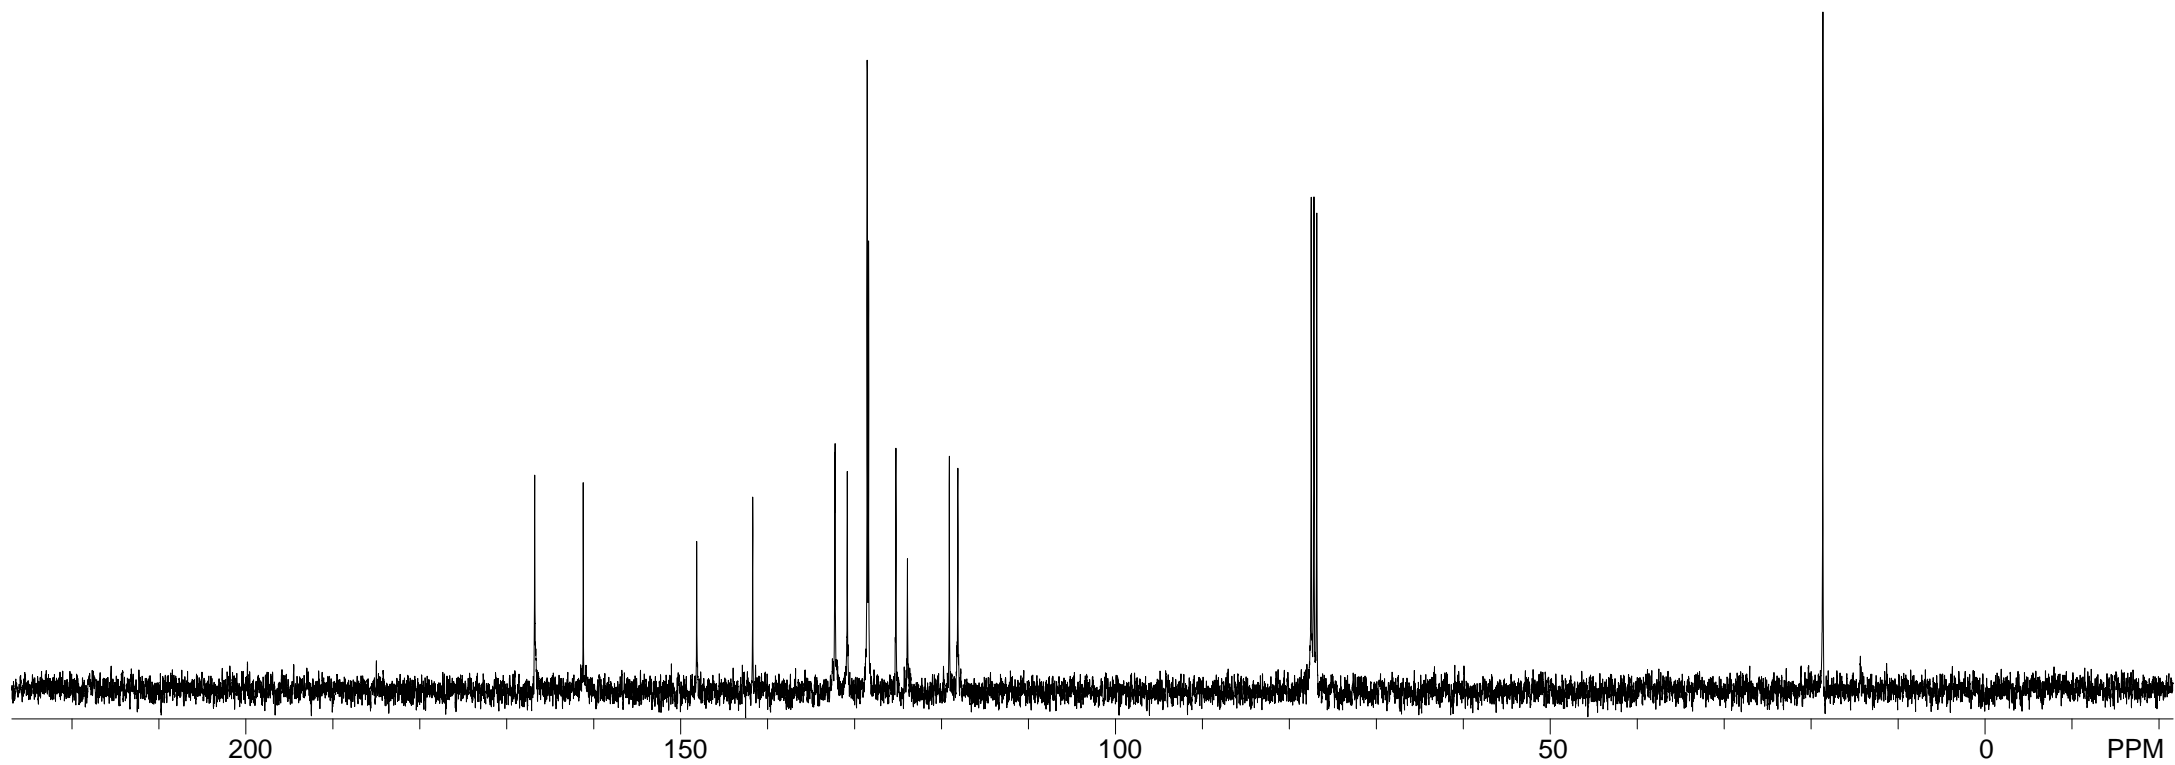

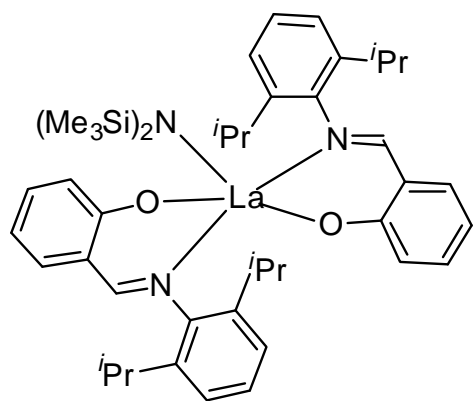

$^1\text{H NMR}(\text{C}_6\text{D}_6, 25^\circ \text{C})$

**1**

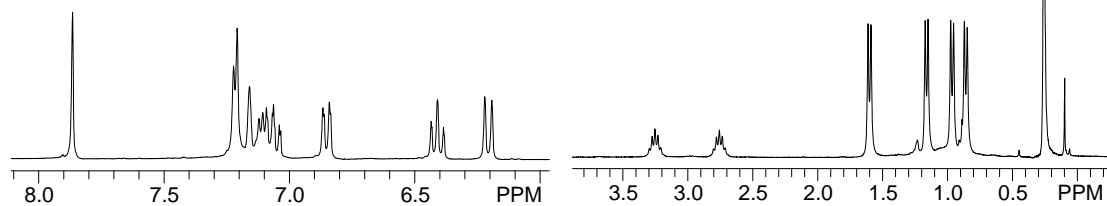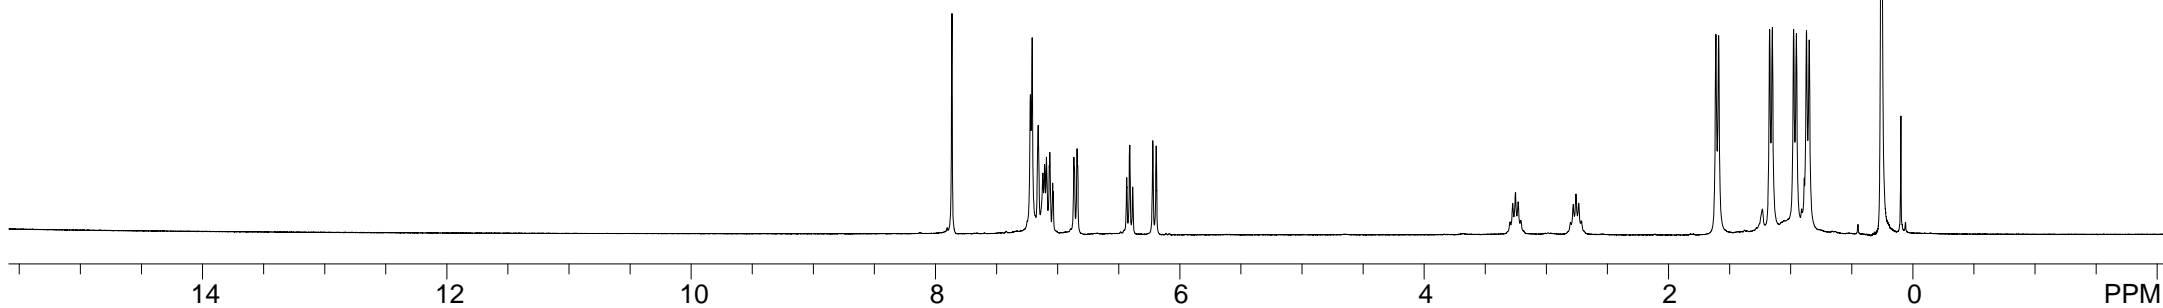

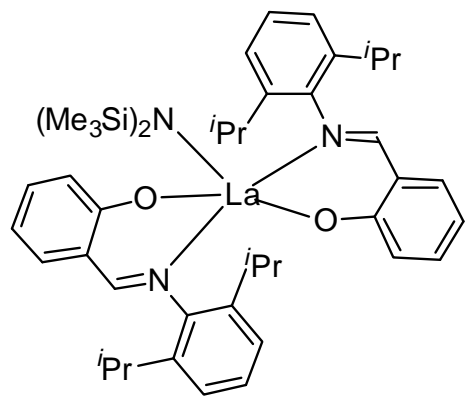

1

$^{13}\text{C}$  NMR ( $\text{C}_6\text{D}_6$ , 25° C)

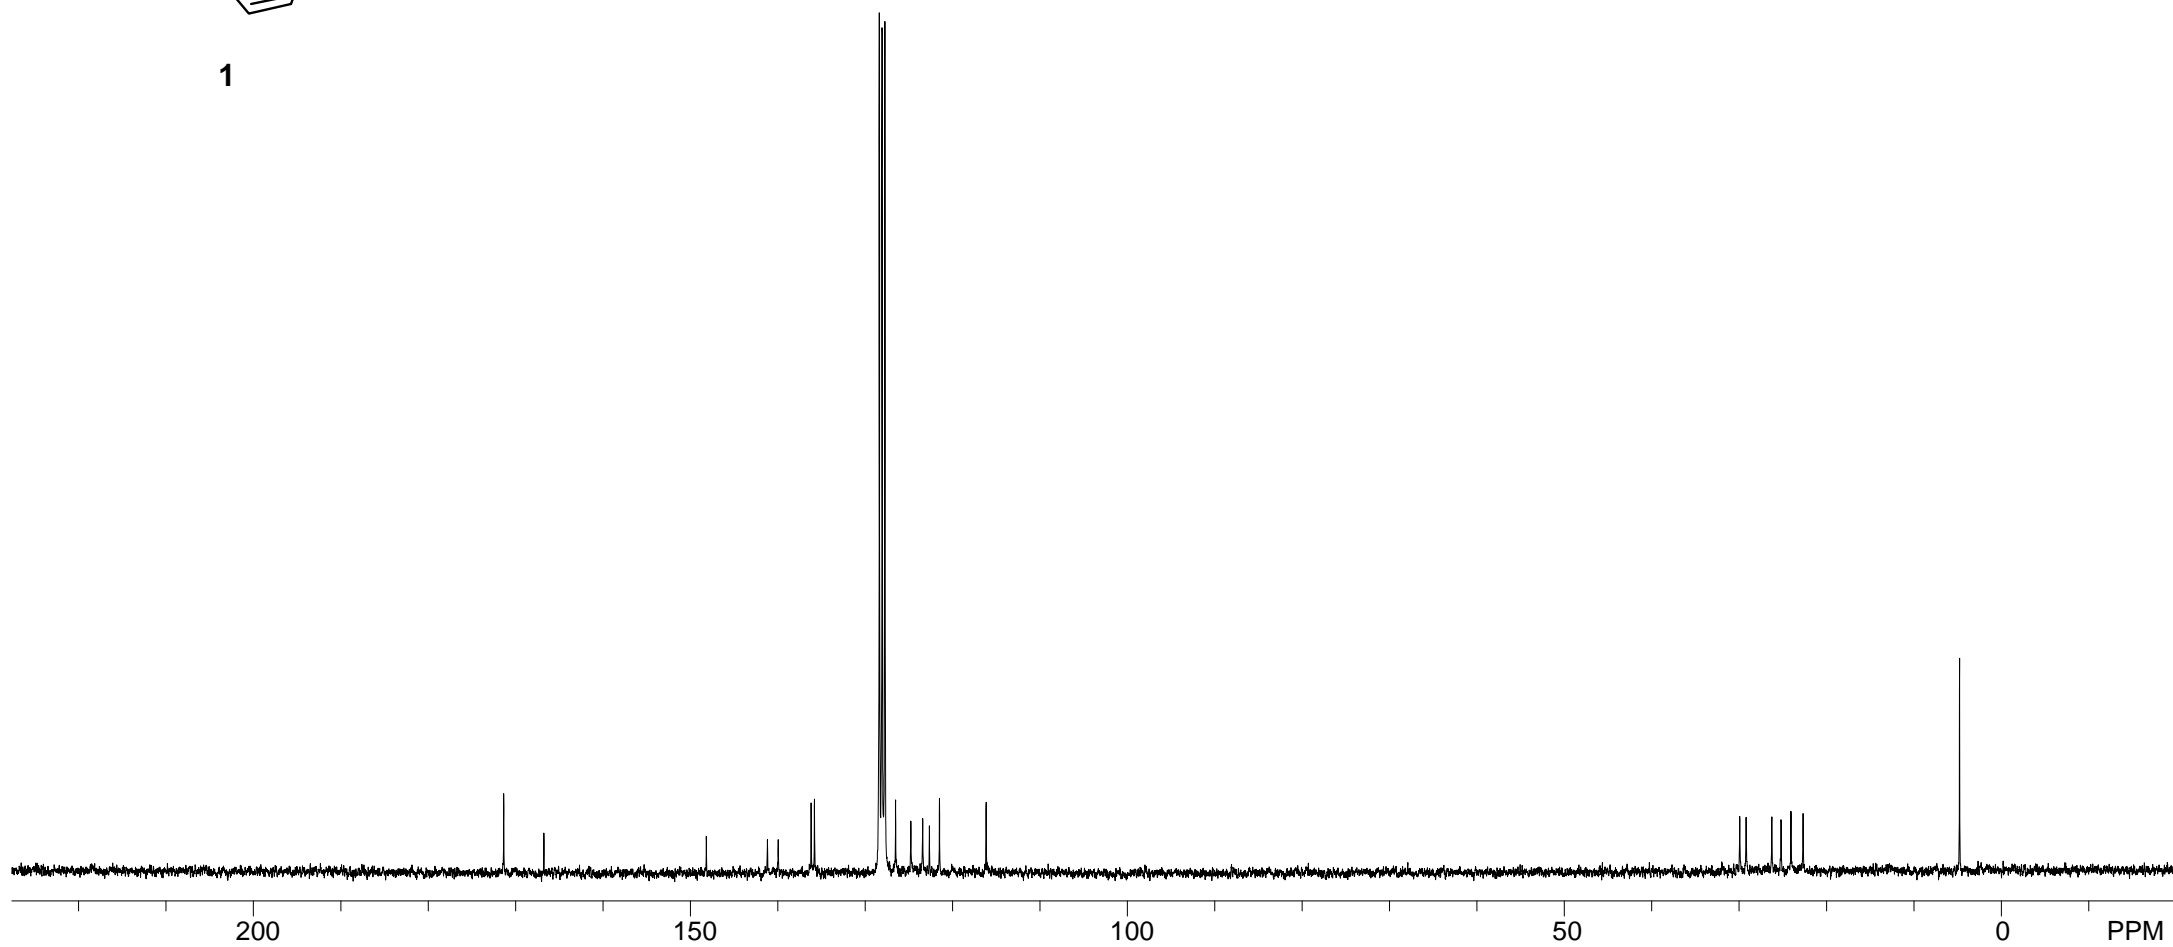

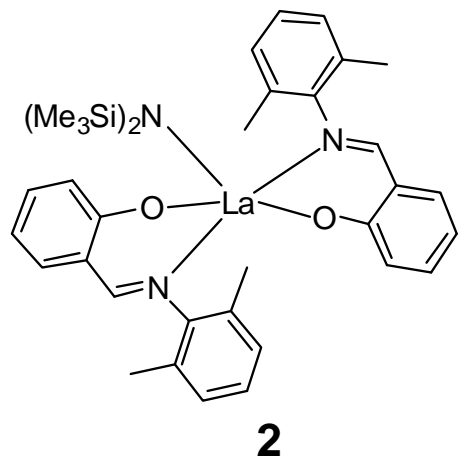

$^1\text{H NMR}$  ( $\text{C}_6\text{D}_6$ ,  $25^\circ\text{C}$ )

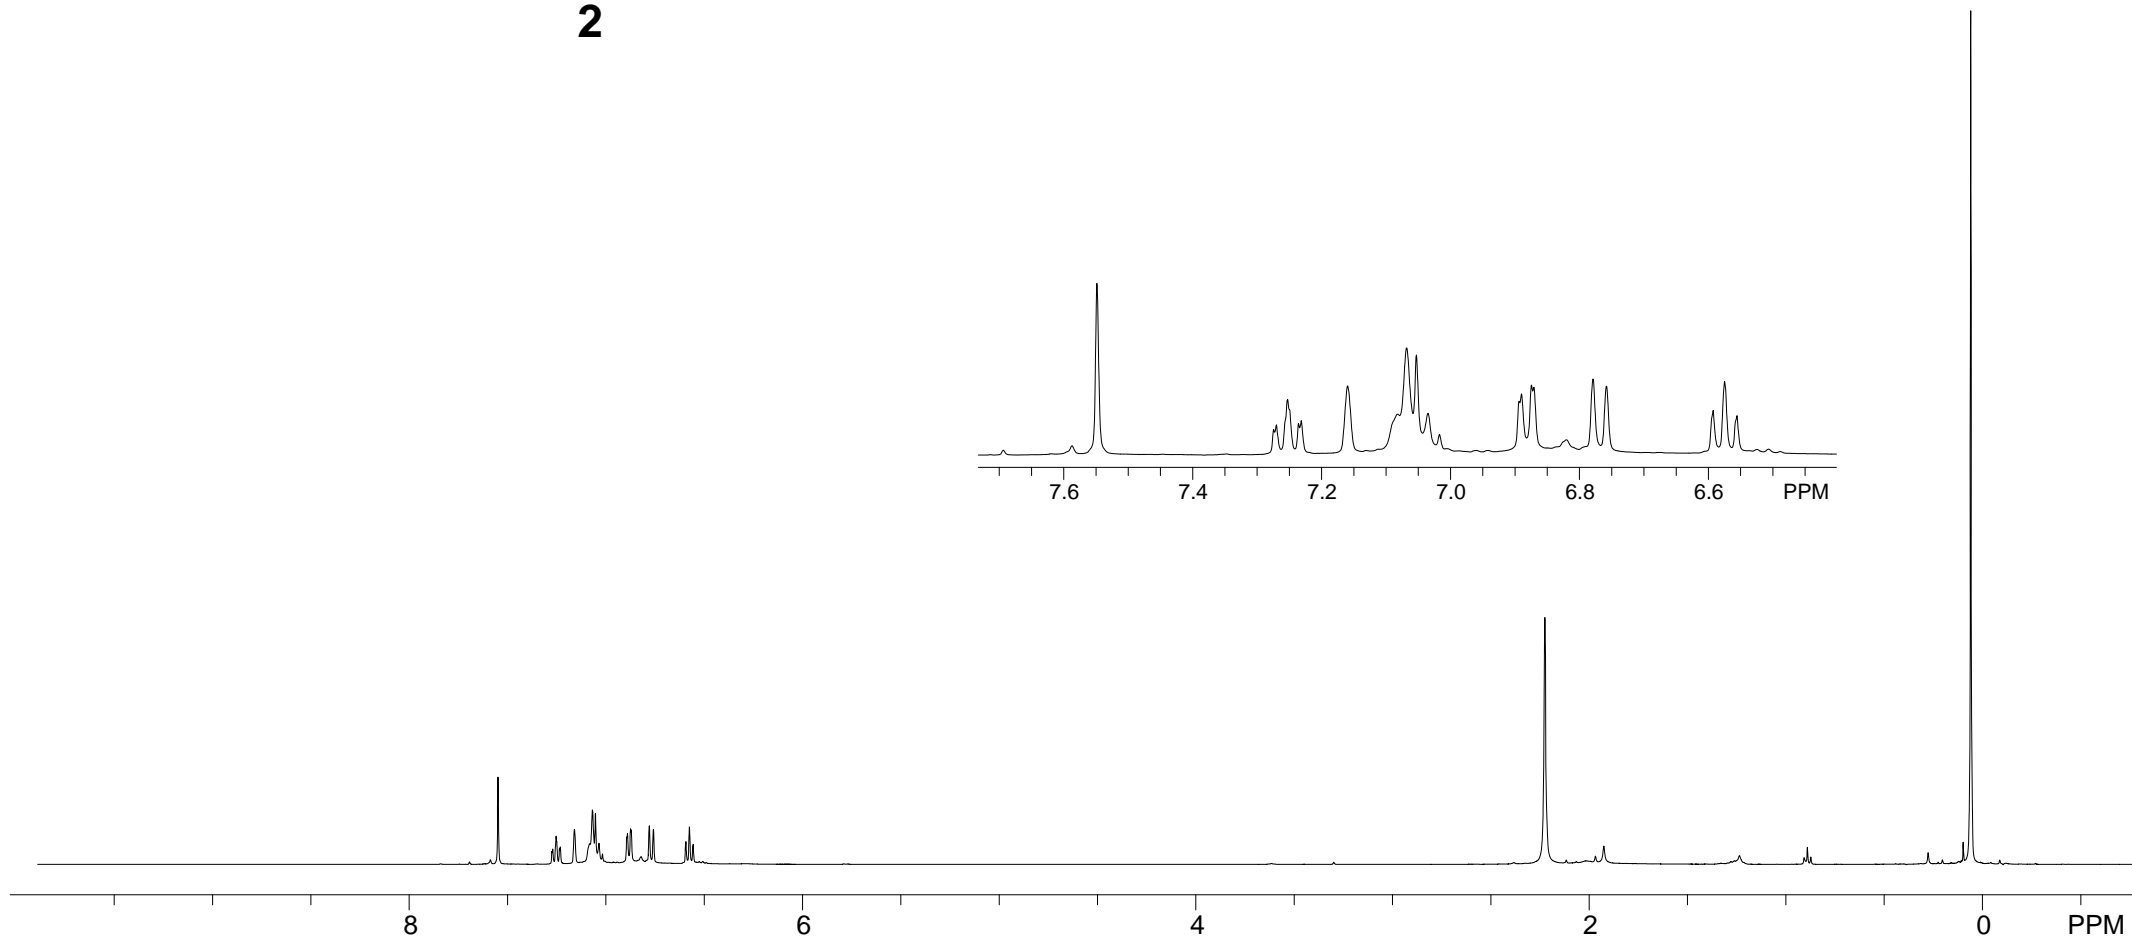

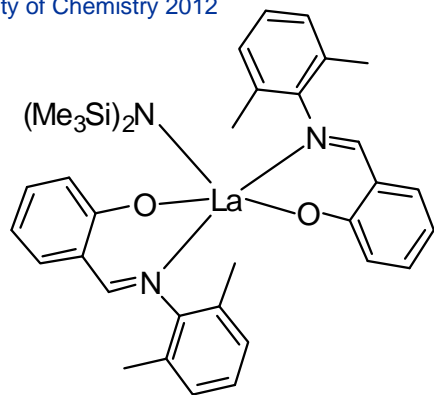

$^{13}\text{C}$  NMR ( $\text{C}_6\text{D}_6$ ,  $25^\circ\text{C}$ )

**2**

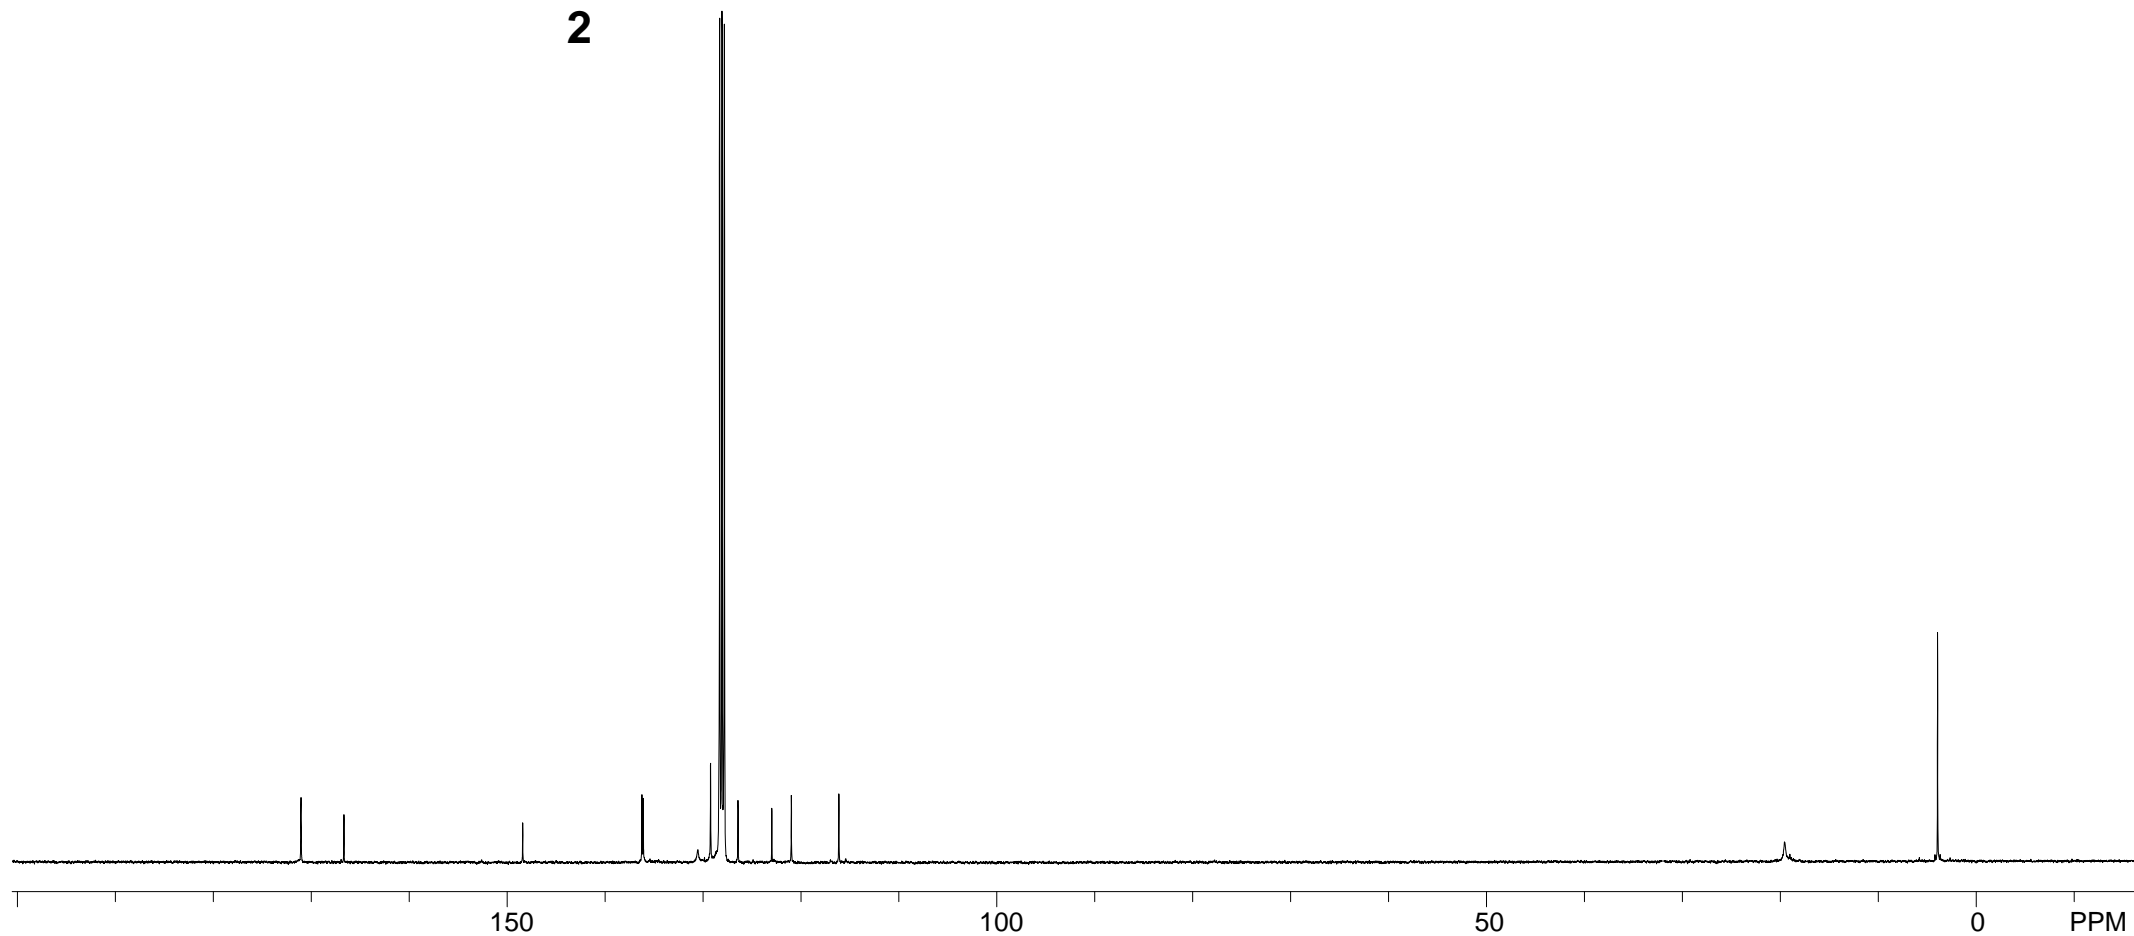

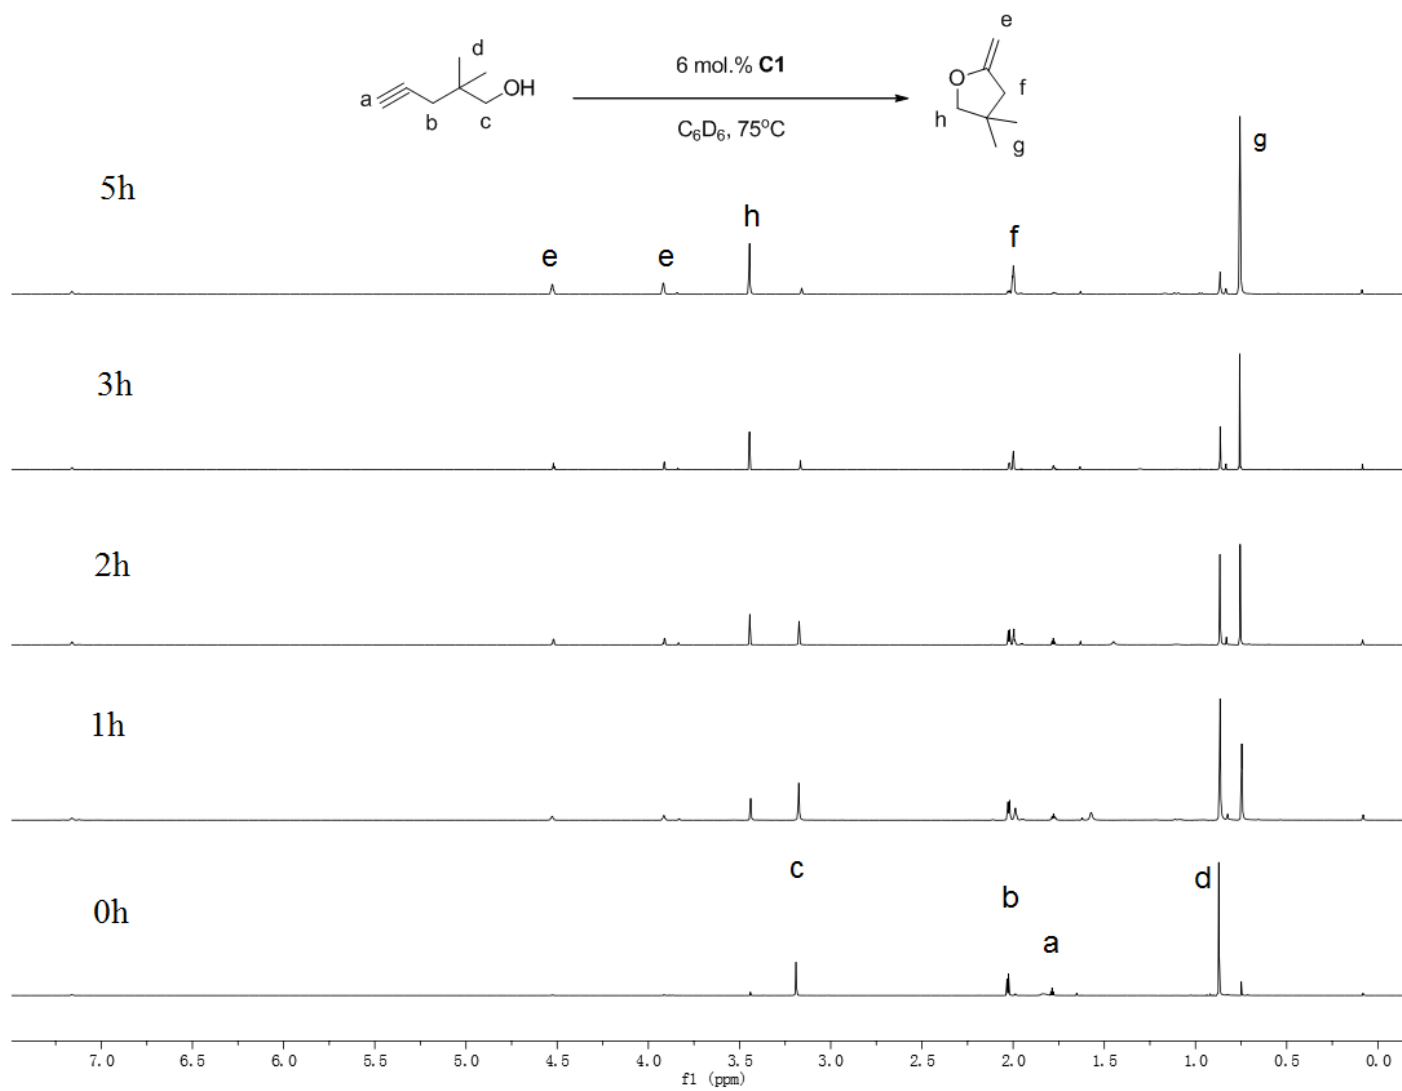

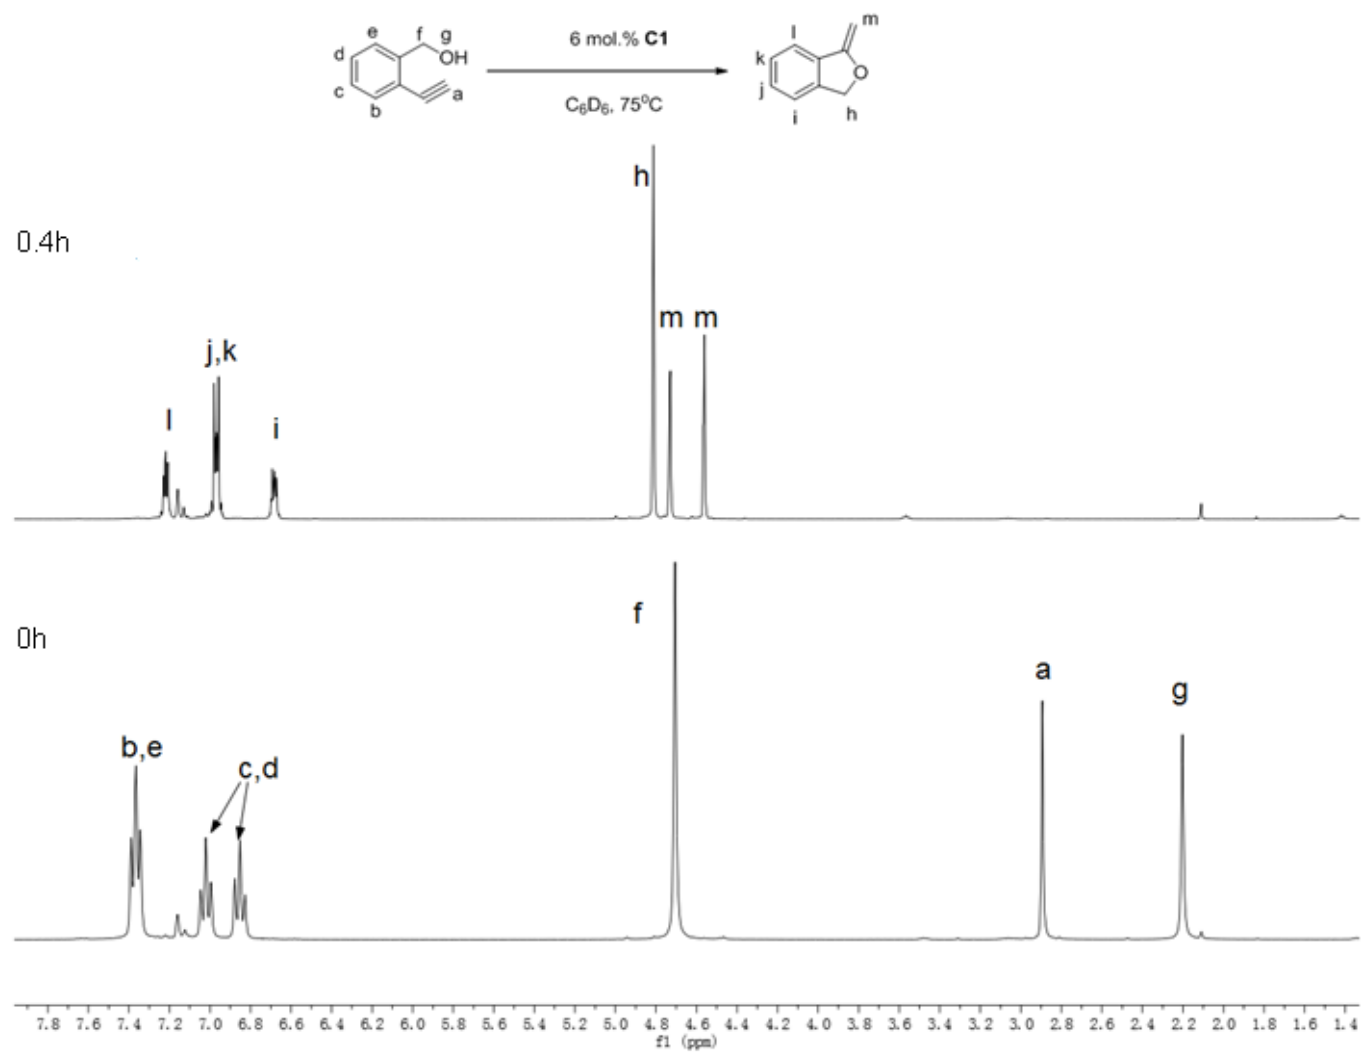

Supplement: c2dt30763d.pdf [file c2dt30763d.pdf]
